# Supplementary material
Source: HighWire-hosted journal article supplement (https://jnm.snmjournals.org/highwire/filestream/95394/field_highwire_adjunct_files/0/214403_Supplemental_Data.pdf)
Supplement: 214403_Supplemental_Data.pdf [file 214403_Supplemental_Data.pdf]

## SUPPLEMENTAL DATA

### SUPPLEMENTAL FIGURE 1. Synthesis and radiolabeling of DOTA-5D3.

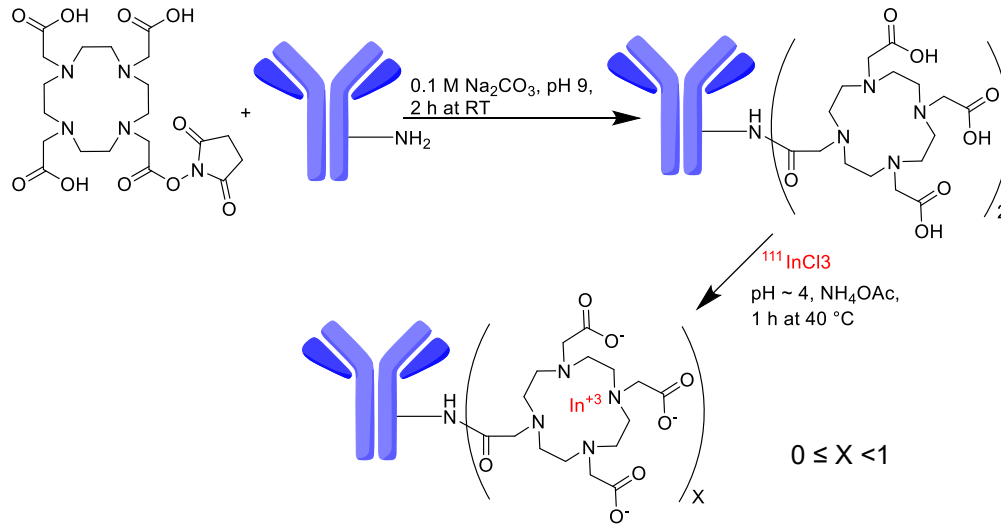

SUPPLEMENTAL FIGURE 2. MALDI-TOF spectra of DOTA-conjugated 5D3 (top) and unmodified 5D3 (bottom).

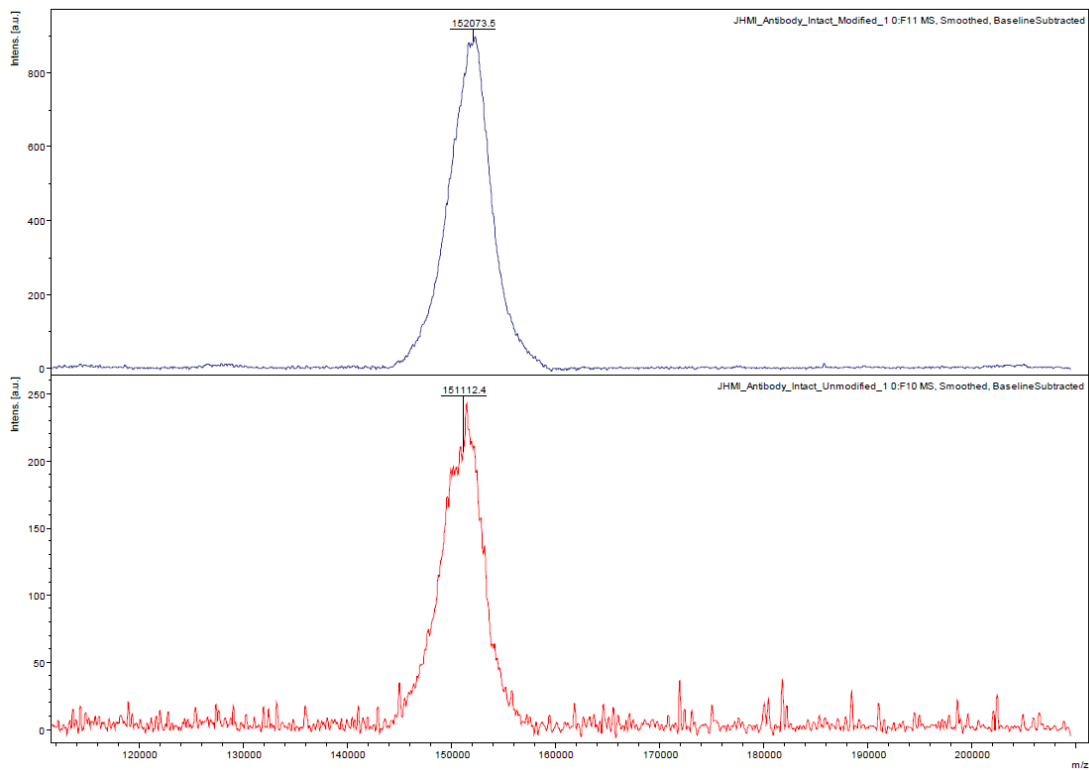

SUPPLEMENTAL FIGURE 3. Plot for blood half-life calculation of  $^{111}\text{In}$ -DOTA-5D3 (n = 4 per time point),  $t_{1/2}$  29.21 h (assuming initial blood activity  $[Y_0] = 40.70 \pm 7.16$  %ID/g at 2 h; monoexponential time-activity curve from GraphPad Prism).

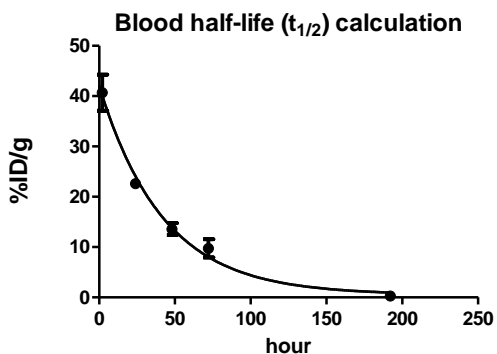

|                                                                                                            |                |
|------------------------------------------------------------------------------------------------------------|----------------|
| K is the rate constant, expressed in reciprocal of the X axis time units                                   | 0.02 to 0.03   |
| Half Life ( $t_{1/2}$ ) is in hour. It is computed as $\ln(2)/K$                                           | 22.16 to 42.84 |
| Tau is the time constant, expressed in the same units as the X axis. It is computed as the reciprocal of K | 31.97 to 61.81 |
| Goodness of Fit                                                                                            |                |
| Degrees of Freedom                                                                                         | 16             |
| $R^2$                                                                                                      | 0.94           |

SUPPLEMENTAL FIGURE 4. %ID/g (Mean  $\pm$  SEM) PSMA(+) PC3 PIP and PSMA(-) PC3 flu during 2 h- 8 d post-injection of  $^{111}\text{In}$ -DOTA-5D3. One sample paired two-tailed t-test (Ref: Supplemental Table 2) (\*,  $P < 0.05$ ; \*\*,  $P < 0.01$ ).

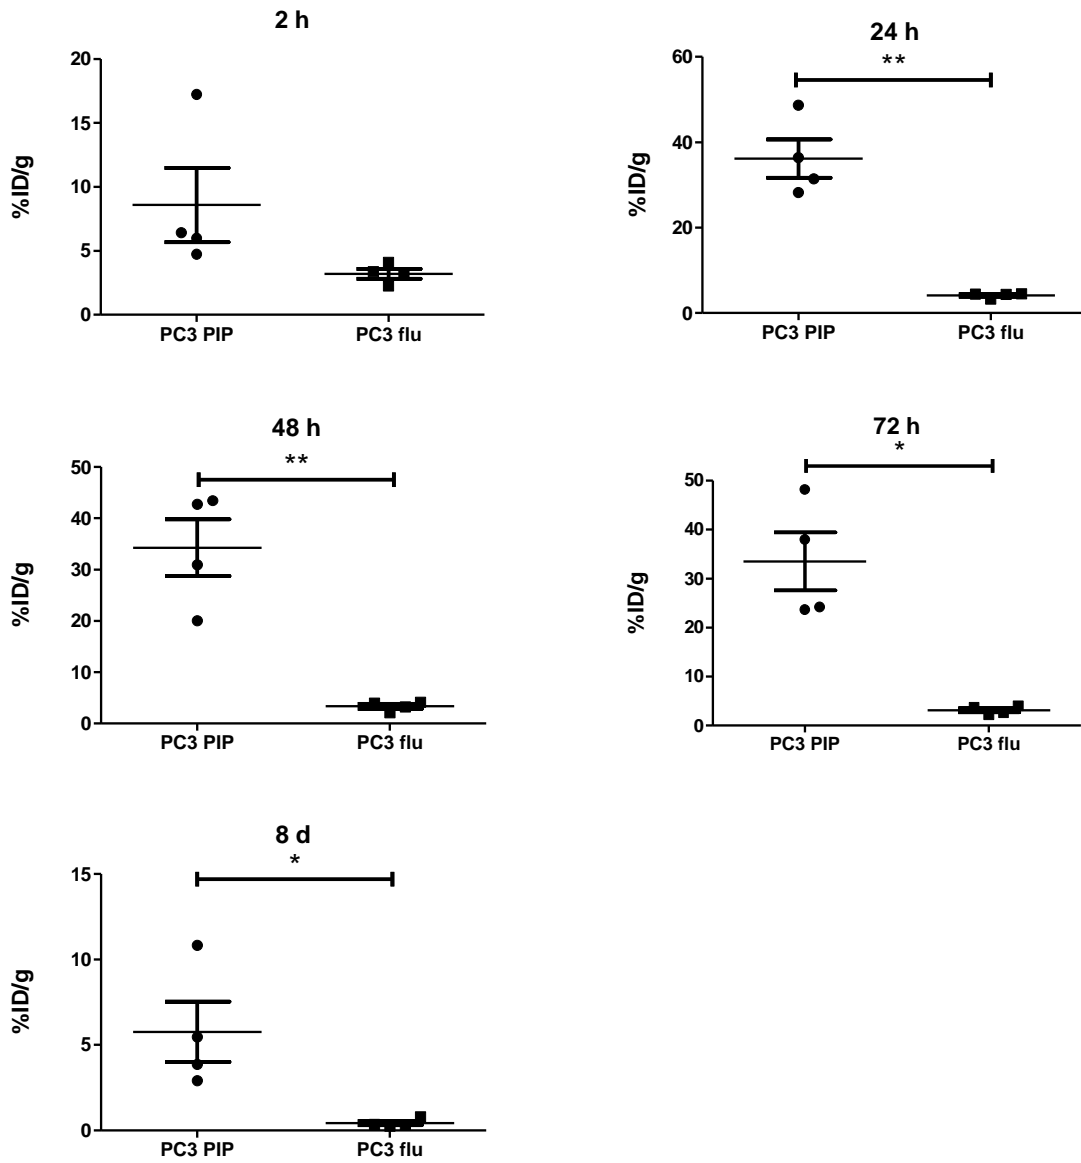

SUPPLEMENTAL FIGURE 5. %ID/g (Mean  $\pm$  SEM) of the selected organs without and with blockade (10-fold or 50-fold unlabeled mAb) at 24 h post-injection of  $^{111}\text{In}$ -DOTA-5D3. Unpaired two-tailed t-test either between unblock to 10-fold block or unblock to 50-fold block (Ref: Table S3) (\*\*,  $P < 0.01$ ; \*\*\*,  $P < 0.001$ ).

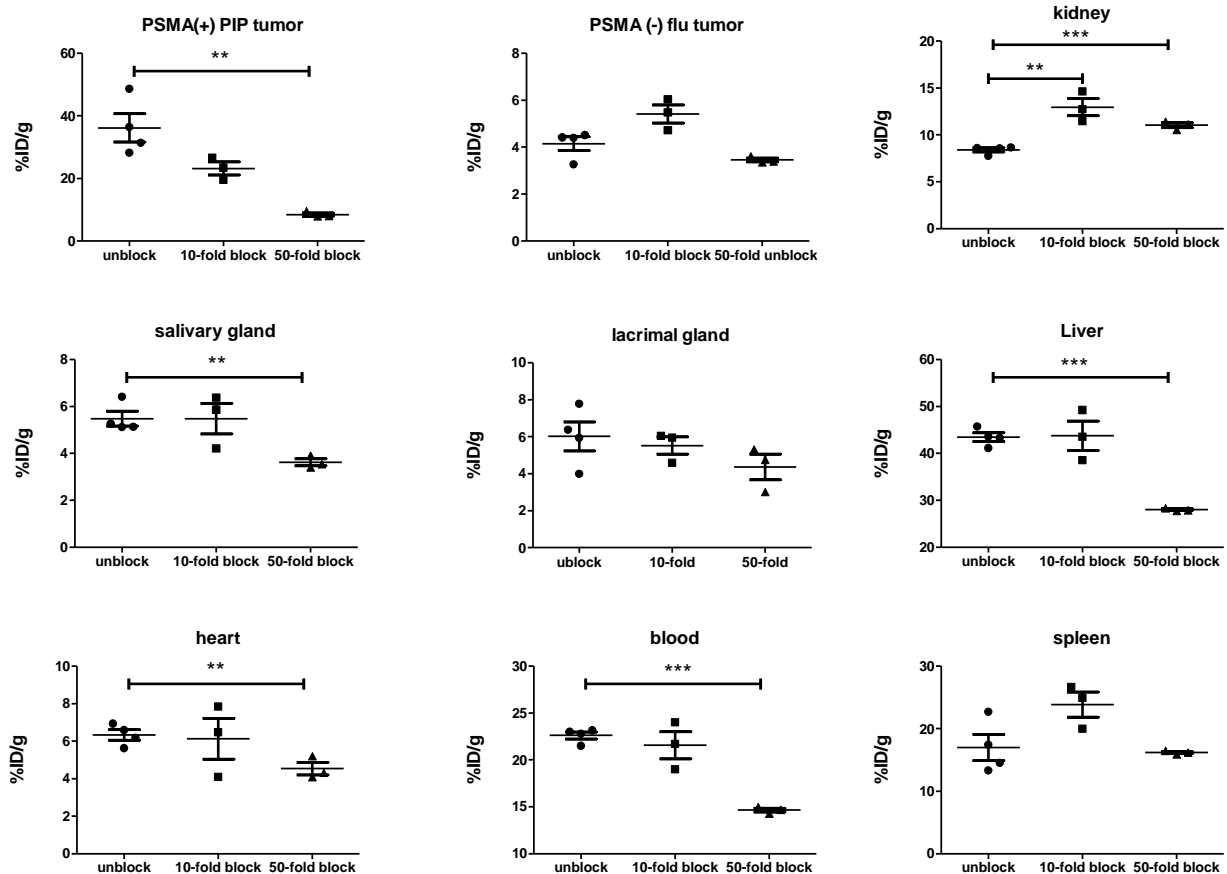

SUPPLEMENTAL FIGURE 6. IHC of PSMA expression of 10% formalin fixed tissue sections of kidney, salivary glands and lacrimal glands and liver using a murine antiPSMA-mAb at 20 x magnification obtained from the same tumor bearing model [PC3 PSMA(+) PIP and PSMA(-) PC3 flu] used for the biodistribution study. Negative control (Control): without antiPSMA-mAb staining.

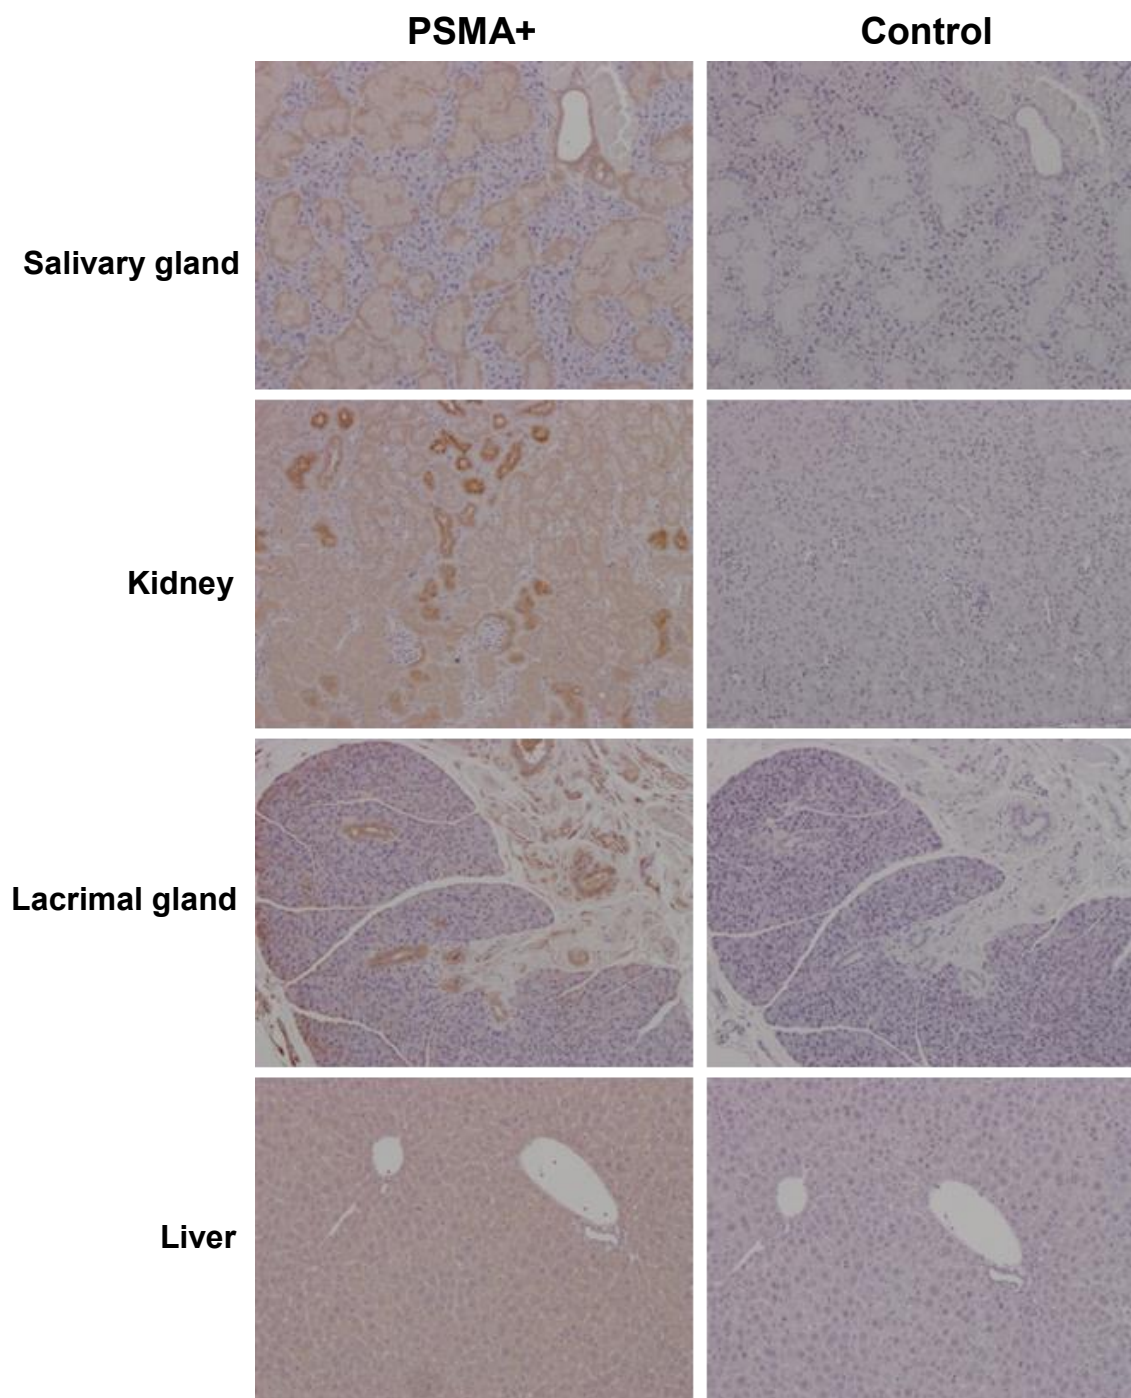

## SUPPLEMENTAL TABLES

SUPPLEMENTAL TABLE 1. Cell uptake and internalization data for PSMA(+) PC3 PIP and PSMA(-) PC3 flu cell line (% incubated dose per  $0.5 \times 10^6$  cells).

| Time   | PSMA(+) PC3 PIP  | PSMA(-) PC3 flu | Cell lysate      | Glycine wash    |
|--------|------------------|-----------------|------------------|-----------------|
| 10 min | 44.27 $\pm$ 1.99 | 0.13 $\pm$ 0.02 | 38.23 $\pm$ 1.65 | 6.37 $\pm$ 0.35 |
| 30 min | 49.04 $\pm$ 1.38 | 0.16 $\pm$ 0.01 | 44.04 $\pm$ 1.56 | 7.25 $\pm$ 0.21 |
| 60 min | 55.29 $\pm$ 1.65 | 0.24 $\pm$ 0.02 | 50.18 $\pm$ 2.72 | 4.02 $\pm$ 0.14 |
| 24 h   | 54.64 $\pm$ 1.12 | 0.93 $\pm$ 0.04 | 52.17 $\pm$ 1.17 | 5.52 $\pm$ 2.26 |

SUPPLEMENTAL TABLE 2. Cell uptake data for PSMA(+) LNCaP and PSMA(-) PC3 cell (% incubated dose per  $0.5 \times 10^6$  cells).

| Time   | LNCaP            | PC3             |
|--------|------------------|-----------------|
| 30 min | 14.65 $\pm$ 0.4  | 0.15 $\pm$ 0.01 |
| 60 min | 23.37 $\pm$ 0.80 | 0.22 $\pm$ 0.01 |
| 24 h   | 50.71 $\pm$ 0.65 | 0.35 $\pm$ 0.02 |

SUPPLEMENTAL TABLE 3. Tissue biodistribution of <sup>111</sup>In-DOTA-5D3 and PSMA(+) tumor-to-normal tissue ratios in male NOD-SCID mice bearing PSMA(+) PC3 PIP and PSMA(-) PC3 flu tumors in either flank. Data are shown as %ID/g, expressed as mean ± SEM.

| Tissue                     | 2 h           | 24 h         | 48 h          | 72 h          | 8 d          |
|----------------------------|---------------|--------------|---------------|---------------|--------------|
| blood                      | 40.70 ± 7.16  | 22.62 ± 0.75 | 11.39 ± 4.68  | 9.74 ± 3.62   | 0.53 ± 0.58  |
| heart                      | 10.65 ± 1.45  | 6.33 ± 0.56  | 2.99 ± 1.29   | 2.76 ± 1.07   | 0.19 ± 0.13  |
| lung                       | 17.26 ± 2.22  | 12.91 ± 1.58 | 8.00 ± 1.79   | 5.38 ± 1.69   | 0.49 ± 0.24  |
| liver                      | 52.26 ± 13.43 | 43.44 ± 1.87 | 34.47 ± 8.01  | 27.24 ± 3.12  | 6.18 ± 0.60  |
| stomach                    | 2.29 ± 0.68   | 2.76 ± 0.45  | 1.48 ± 0.54   | 1.31 ± 0.34   | 0.13 ± 0.10  |
| pancreas                   | 2.76 ± 0.14   | 2.66 ± 0.54  | 1.39 ± 0.35   | 1.24 ± 0.30   | 0.13 ± 0.08  |
| spleen                     | 16.99 ± 4.18  | 15.83 ± 2.22 | 16.22 ± 6.99  | 14.65 ± 0.55  | 6.48 ± 2.08  |
| fat                        | 1.10 ± 0.59   | 2.13 ± 0.64  | 0.93 ± 0.44   | 0.87 ± 0.13   | 0.10 ± 0.09  |
| kidney                     | 8.77 ± 1.06   | 8.40 ± 0.42  | 5.76 ± 0.87   | 5.52 ± 0.53   | 0.77 ± 0.15  |
| muscle                     | 0.73 ± 0.15   | 1.02 ± 0.08  | 0.66 ± 0.19   | 0.64 ± 0.20   | 0.06 ± 0.05  |
| small intestine            | 8.62 ± 1.70   | 5.90 ± 1.53  | 2.78 ± 1.17   | 2.14 ± 0.78   | 0.28 ± 0.20  |
| salivary glands            | 3.73 ± 0.92   | 5.48 ± 0.63  | 2.93 ± 1.03   | 2.98 ± 0.32   | 0.33 ± 0.19  |
| lacrimial glands           | 3.72 ± 0.70   | 6.02 ± 1.57  | 3.54 ± 1.90   | 3.45 ± 0.86   | 0.26 ± 0.18  |
| bone                       | 4.00 ± 0.85   | 3.78 ± 0.17  | 2.36 ± 0.37   | 2.13 ± 0.56   | 0.47 ± 0.06  |
| PC3 PIP                    | 5.72 ± 0.87   | 36.19 ± 9.00 | 34.27 ± 11.11 | 33.53 ± 11.80 | 5.77 ± 3.53  |
| PC3 flu                    | 3.21 ± 0.76   | 4.15 ± 0.59  | 3.34 ± 0.95   | 3.15 ± 0.87   | 0.43 ± 0.25  |
|                            |               |              |               |               |              |
| tumor/blood                | 0.20 ± 0.11   | 1.60 ± 0.39  | 2.82 ± 0.70   | 3.51 ± 0.15   | 9.07 ± 2.59  |
| tumor/liver                | 0.44 ± 0.31   | 0.84 ± 0.22  | 3.57 ± 2.28   | 1.25 ± 0.52   | 0.98 ± 2.28  |
| tumor/spleen               | 0.48 ± 0.20   | 2.28 ± 0.39  | 2.12 ± 1.42   | 1.94 ± 0.52   | 1.00 ± 1.42  |
| tumor/kidney               | 0.95 ± 0.53   | 4.32 ± 1.08  | 5.89 ± 1.46   | 5.97 ± 1.53   | 7.08 ± 1.46  |
| tumor/muscle               | 11.74 ± 6.89  | 35.66 ± 9.21 | 51.74 ± 5.68  | 51.90 ± 3.66  | 92.63 ± 5.68 |
| tumor/<br>salivary glands  | 2.24 ± 1.10   | 6.75 ± 2.16  | 12.51 ± 0.77  | 11.04 ± 2.70  | 17.00 ± 0.77 |
| tumor/<br>lacrimial glands | 2.39 ± 1.73   | 6.72 ± 3.79  | 2.69 ± 1.87   | 9.62 ± 1.68   | 24.60 ± 1.87 |
| tumor/ flu tumor           | 1.82 ± 0.27   | 8.79 ± 2.03  | 10.16 ± 0.60  | 10.52 ± 1.06  | 13.26 ± 0.60 |

SUPPLEMENTAL TABLE 4. Tissue biodistribution of  $^{111}\text{In}$ -DOTA-5D3 at 24 h post-injection without and with excess of non-radiolabeled 5D3 in 10- and 50-fold excess used for blocking to determine binding specificity. Male NOD-SCID mice bearing PSMA(+) PC3 PIP and PSMA(-) PC3 flu tumors in either flank were used. Data are show as %ID/g, expressed as mean  $\pm$  SEM; sm. int. = small intestine, saliv. gland = salivary glands, lacrim. glands = lacrimal gland.

| Tissue                   | 24 h             | 24h Blocking<br>0.1 mg | 24h Blocking<br>0.5 mg |
|--------------------------|------------------|------------------------|------------------------|
| blood                    | 22.62 $\pm$ 0.75 | 21.58 $\pm$ 2.50       | 14.66 $\pm$ 0.36       |
| heart                    | 6.33 $\pm$ 0.56  | 6.14 $\pm$ 1.90        | 4.54 $\pm$ 0.59        |
| lung                     | 12.91 $\pm$ 1.58 | 11.38 $\pm$ 1.93       | 6.70 $\pm$ 0.53        |
| liver                    | 43.44 $\pm$ 1.87 | 43.78 $\pm$ 5.36       | 28.00 $\pm$ 0.29       |
| stomach                  | 2.76 $\pm$ 0.45  | 3.20 $\pm$ 1.04        | 1.72 $\pm$ 0.28        |
| pancreas                 | 2.66 $\pm$ 0.54  | 2.35 $\pm$ 0.50        | 1.61 $\pm$ 0.21        |
| spleen                   | 15.83 $\pm$ 2.23 | 23.87 $\pm$ 3.47       | 16.20 $\pm$ 0.29       |
| fat                      | 2.13 $\pm$ 0.64  | 1.79 $\pm$ 0.51        | 1.21 $\pm$ 0.62        |
| kidney                   | 8.40 $\pm$ 0.42  | 12.96 $\pm$ 1.59       | 11.03 $\pm$ 0.46       |
| muscle                   | 1.02 $\pm$ 0.08  | 1.26 $\pm$ 0.26        | 0.83 $\pm$ 0.19        |
| small intestine          | 5.90 $\pm$ 1.53  | 7.75 $\pm$ 1.61        | 4.28 $\pm$ 1.19        |
| salivary glands          | 5.48 $\pm$ 0.63  | 5.48 $\pm$ 1.13        | 3.62 $\pm$ 0.27        |
| lacrimal glands          | 6.02 $\pm$ 1.57  | 5.52 $\pm$ 0.81        | 4.37 $\pm$ 1.20        |
| bladder                  | 4.27 $\pm$ 0.19  | 4.73 $\pm$ 0.71        | 2.65 $\pm$ 0.57        |
| bone                     | 3.78 $\pm$ 0.17  | 5.10 $\pm$ 1.21        | 3.88 $\pm$ 0.42        |
| PC3 PIP                  | 36.19 $\pm$ 8.90 | 23.20 $\pm$ 3.56       | 8.45 $\pm$ 0.92        |
| PC3 flu                  | 4.15 $\pm$ 0.59  | 5.42 $\pm$ 0.66        | 3.46 $\pm$ 0.14        |
|                          |                  |                        |                        |
| tumor/blood              | 1.60 $\pm$ 0.39  | 1.07 $\pm$ 0.04        | 0.56 $\pm$ 0.05        |
| tumor/liver              | 0.84 $\pm$ 0.22  | 0.53 $\pm$ 0.02        | 0.30 $\pm$ 0.03        |
| tumor/spleen             | 2.28 $\pm$ 0.39  | 0.97 $\pm$ 0.03        | 0.52 $\pm$ 0.07        |
| tumor/kidney             | 4.32 $\pm$ 1.08  | 1.79 $\pm$ 0.07        | 0.76 $\pm$ 0.06        |
| tumor/muscle             | 35.66 $\pm$ 9.21 | 18.50 $\pm$ 1.43       | 10.53 $\pm$ 2.79       |
| tumor/salivary<br>glands | 6.75 $\pm$ 2.16  | 4.27 $\pm$ 0.33        | 2.34 $\pm$ 0.32        |
| tumor/lacrimal<br>glands | 6.72 $\pm$ 3.79  | 4.20 $\pm$ 0.24        | 2.10 $\pm$ 0.91        |
| PIP/flu                  | 8.79 $\pm$ 2.03  | 4.29 $\pm$ 0.51        | 2.44 $\pm$ 0.17        |



SUPPLEMENTAL TABLE 5. Complete list of tissue biodistribution of  $^{111}\text{In}$ -DOTA-5D3 in male tumor free CD-1 mice (n = 4). Data are % ID/g, expressed as mean  $\pm$  SD)

| <b>Tissue</b>   | 2 h              | 24 h             |
|-----------------|------------------|------------------|
| Blood           | 30.68 $\pm$ 3.02 | 12.51 $\pm$ 0.58 |
| Heart           | 8.28 $\pm$ 1.26  | 3.71 $\pm$ 0.26  |
| Lung            | 14.39 $\pm$ 3.22 | 7.35 $\pm$ 0.90  |
| Liver           | 33.25 $\pm$ 6.96 | 18.97 $\pm$ 1.81 |
| Stomach         | 1.59 $\pm$ 0.18  | 1.50 $\pm$ 0.06  |
| Pancreas        | 2.76 $\pm$ 0.21  | 1.95 $\pm$ 0.189 |
| Spleen          | 24.75 $\pm$ 8.44 | 15.44 $\pm$ 2.86 |
| Fat             | 0.68 $\pm$ 0.32  | 0.51 $\pm$ 0.47  |
| Kidney          | 7.66 $\pm$ 0.63  | 4.55 $\pm$ 0.11  |
| Muscle          | 0.81 $\pm$ 0.13  | 1.15 $\pm$ 0.07  |
| Small intestine | 5.77 $\pm$ 1.32  | 3.53 $\pm$ 0.58  |
| Salivary glands | 2.94 $\pm$ 0.72  | 3.39 $\pm$ 0.43  |
| Lacrimal glands | 2.97 $\pm$ 0.65  | 4.11 $\pm$ 0.68  |
| Bladder         | 2.06 $\pm$ 0.61  | 3.08 $\pm$ 0.92  |
| Bone            | 4.21 $\pm$ 0.36  | 2.91 $\pm$ 0.50  |

SUPPLEMENTAL TABLE 6. Time-Integrated Activity Coefficients (TIACs) (Human Organs)

| Organ                | Organ Reference Mass in Olinda or ICRP publications (g) | Integrated Activity Coefficients (h) |                   |
|----------------------|---------------------------------------------------------|--------------------------------------|-------------------|
|                      |                                                         | <sup>111</sup> In                    | <sup>177</sup> Lu |
| Red Marrow           | 1300                                                    | 0.42                                 | 0.51              |
| Heart                | 250                                                     | 0.34                                 | 0.42              |
| Lungs                | 800                                                     | 2.07                                 | 2.61              |
| Liver                | 1400                                                    | 15.24                                | 20.96             |
| Stomach              | 140                                                     | 0.05                                 | 0.07              |
| Pancreas             | 85                                                      | 0.03                                 | 0.05              |
| Spleen               | 150                                                     | 0.66                                 | 1.07              |
| Fat                  | 14600                                                   | 3.74                                 | 4.92              |
| Kidneys              | 275                                                     | 0.43                                 | 0.57              |
| Muscle               | 28000                                                   | 4.37                                 | 5.94              |
| Small Int.           | 600                                                     | 0.60                                 | 0.76              |
| Cortical Bone        | 4400                                                    | 2.74                                 | 3.80              |
| Trabecular Bone      | 1100                                                    | 0.69                                 | 0.95              |
| Urinary Bladder Wall | 47.6                                                    | 0.03                                 | 0.05              |
| Parotid Glands       | 50                                                      | 0.04                                 | 0.05              |
| Submandibular Glands | 25                                                      | 0.02                                 | 0.03              |
| Lacrimal Glands      | 0.21*                                                   | 0.0002                               | 0.0003            |

\*Reference mass for lacrimal glands is calculated from the CT drawn volumes of nine patients in the DCFPyL study (1); reference mass for fat, cortical bone, trabecular bone (2) and parotid glands and submandibular glands (3).

SUPPLEMENTAL TABLE 7. Human Organ Absorbed Doses

| Target organs        | Organ Dose (mGy/MBq) |                   |
|----------------------|----------------------|-------------------|
|                      | <sup>111</sup> In    | <sup>177</sup> Lu |
| Adrenals             | 0.10                 | 0.01              |
| Brain                | 0.01                 | 0.0008            |
| Breasts              | 0.02                 | 0.003             |
| Gallbladder Wall     | 0.16                 | 0.02              |
| LLI Wall             | 0.02                 | 0.002             |
| Small Intestine      | 0.05                 | 0.08              |
| Stomach Wall         | 0.05                 | 0.02              |
| ULI Wall             | 0.05                 | 0.01              |
| Heart Wall           | 0.08                 | 0.05              |
| Kidneys              | <b>0.12</b>          | <b>0.17</b>       |
| Liver                | <b>0.52</b>          | <b>0.97</b>       |
| Lungs                | 0.12                 | 0.23              |
| Muscle               | 0.03                 | 0.02              |
| Ovaries              | 0.02                 | 0.003             |
| Pancreas             | 0.10                 | 0.06              |
| Red Marrow           | <b>0.04</b>          | <b>0.04</b>       |
| Osteogenic Cells     | 0.12                 | 0.25              |
| Skin                 | 0.01                 | 0.002             |
| Spleen               | <b>0.18</b>          | <b>0.51</b>       |
| Testes               | 0.01                 | 0.0009            |
| Thymus               | 0.03                 | 0.003             |
| Thyroid              | 0.01                 | 0.002             |
| Urinary Bladder Wall | 0.02                 | 0.01              |
| Uterus               | 0.02                 | 0.003             |
| Total Body           | 0.04                 | 0.05              |
| Lacrimal glands      | <b>0.03</b>          | <b>0.12</b>       |
| Parotid glands       | <b>0.03</b>          | <b>0.10</b>       |
| Submandibular glands | <b>0.04</b>          | <b>0.14</b>       |

## REFERENCES CITED

1. Plyku D, Mena E, Rowe SP, et al. Combined model-based and patient-specific dosimetry for (18)F-DCFPyL, a PSMA-targeted PET agent. *Eur J Nucl Med Mol Imaging*. 2018;45:989-998.
2. ICRP. Publication 89, Basic Anatomical and Physiological Data for Use in Radiological Protection Reference Values. . *Ann ICRP*. 2002;32:3-4.
3. Snyder WS, Cook MJ, Nasset ES, Karhausen LR, Howells GP, Tipton IH. ICRP Publication 23, Report of the task group on reference man. Elmsford, NY: International Commission on Radiological Protection; . 1975.
